# Supplementary material for: Hydrogen sulfide binds to the catalytic zinc ion in HDAC6 to modulate enzyme activity via an alternative deacetylation pathway
Source: Research Square preprint supplement (doi:10.21203/rs.3.rs-777997/v1), 2026-01-12

## Uncut gel image used in the manuscript

### Fig. 1b

Full unedited gel for Fig. 1b

The lanes in the red box are the lanes in Fig. 1b

The groups in the blue box are Vehicle, NaHS (60  $\mu$ M), respectively.

Antibodies against HDAC6

### Chemiluminescence image

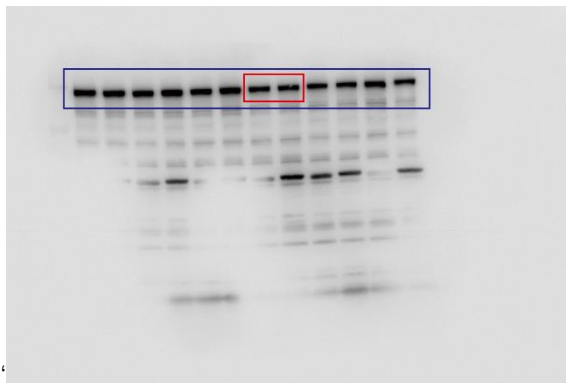

### Digital image

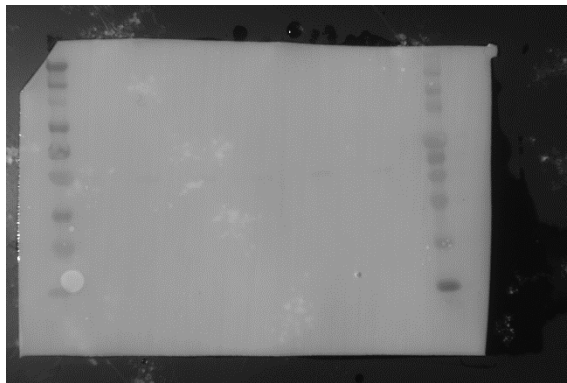

### Fig. 1b

Full unedited gel for Fig. 1b

The lanes in the red box are the lanes in Fig. 1b

The groups in the blue box are Vehicle, NaHS (60  $\mu$ M), respectively.

Antibodies against acetylated  $\alpha$ -tubulin

### Chemiluminescence image

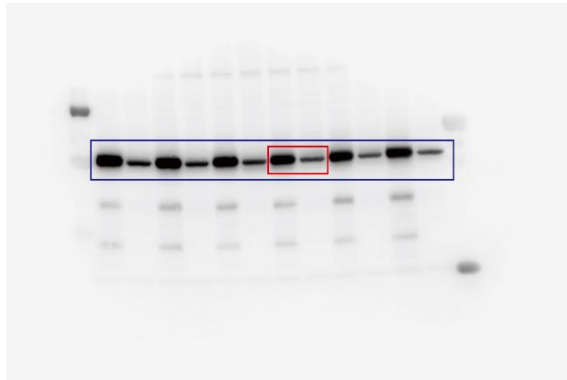

### Digital image

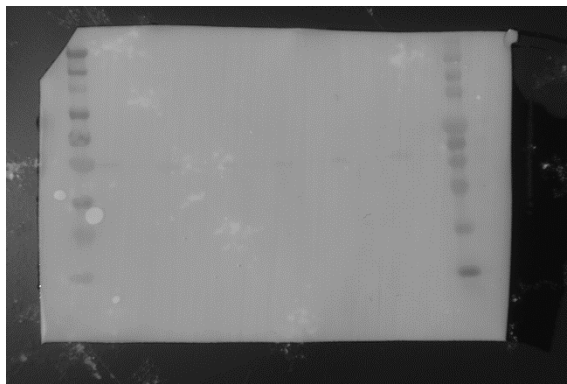

### Fig. 1b

Full unedited gel for Fig. 1b

The lanes in the red box are the lanes in Fig. 1b

The groups in the blue box are Vehicle, NaHS (60  $\mu$ M), Vehicle, and NaHS (60  $\mu$ M), respectively.

Antibodies against  $\alpha$ -tubulin

### Chemiluminescence image

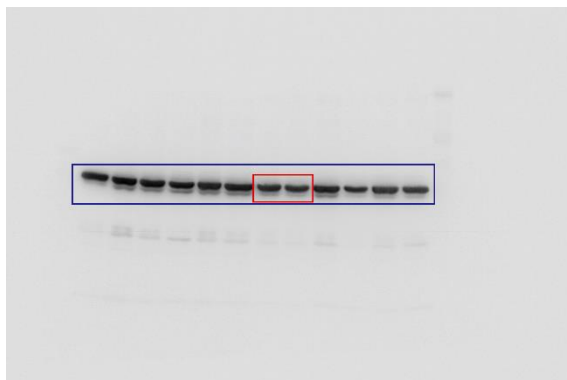

## Digital image

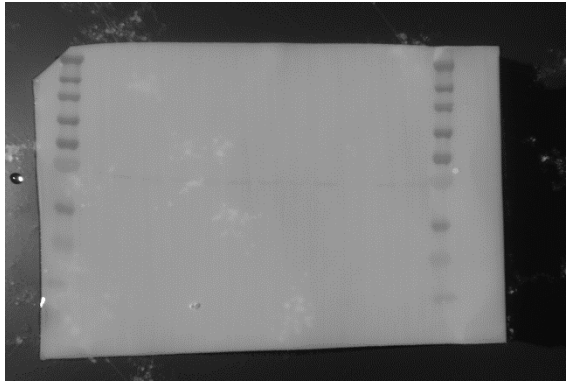

## Fig. 1e

Full unedited gel for Fig. 1e

The lanes in the red box are the lanes in Fig. 1e

The groups in the red box are WT, sh-NC, sh-HDAC6-1, and sh-HDAC6-2, respectively.

Antibodies against HDAC6

## Chemiluminescence image

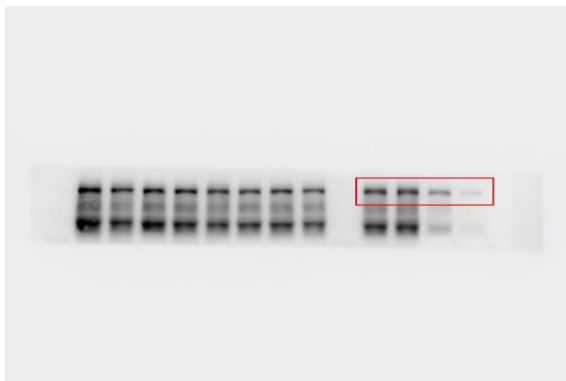

## Digital image

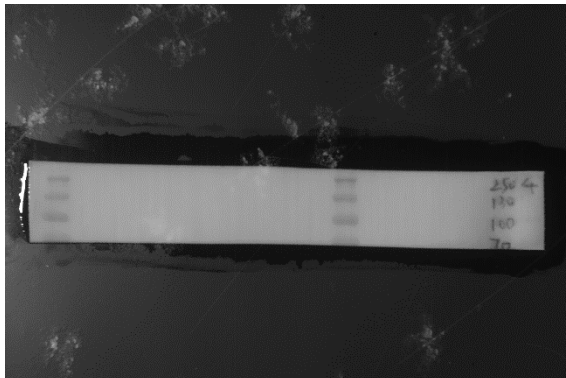

### Fig. 1e

Full unedited gel for Fig. 1e

The lanes in the red box are the lanes in Fig. 1e

The groups in the red box are WT, sh-NC, sh-HDAC6-1, and sh-HDAC6-2, respectively.

Antibodies against acetylated  $\alpha$ -tubulin

### Chemiluminescence image

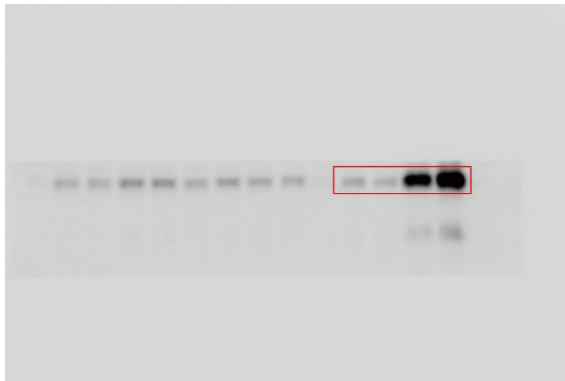

### Digital image

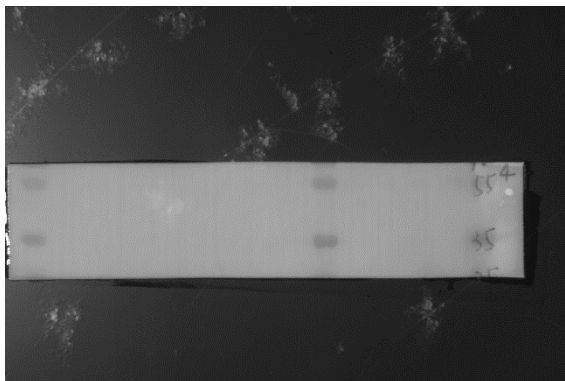

### Fig. 1e

Full unedited gel for Fig. 1e

The lanes in the red box are the lanes in Fig. 1e

The groups in the red box are WT, sh-NC, sh-HDAC6-1, and sh-HDAC6-2, respectively.

Antibodies against  $\alpha$ -tubulin

### Chemiluminescence image

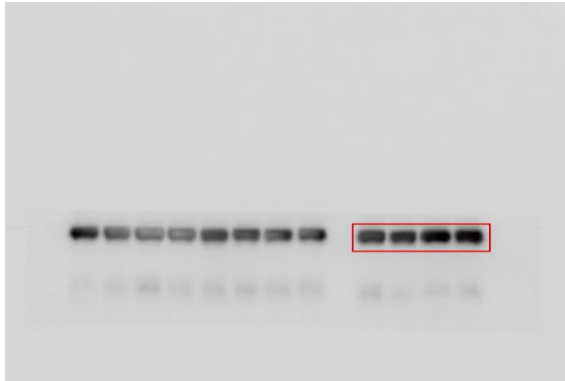

### Digital image

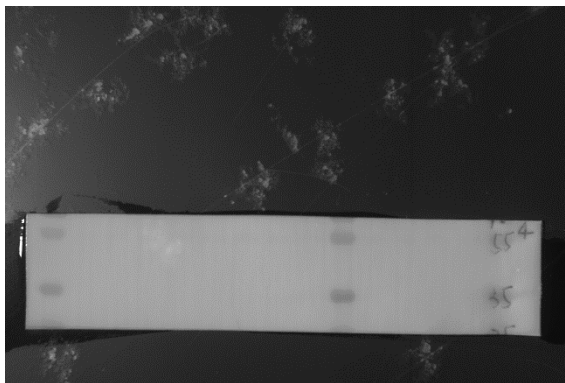

### Fig. S1d

Full unedited gel for Fig. S1d

The lanes in the red box are the lanes in Fig. S1d

The groups in the red box are WT, WT, WT, WT, HDAC6<sup>-/-</sup>, HDAC6<sup>-/-</sup>, HDAC6<sup>-/-</sup>, and HDAC6<sup>-/-</sup>, respectively.

Antibodies against HDAC6

### Chemiluminescence image (Heart tissue)

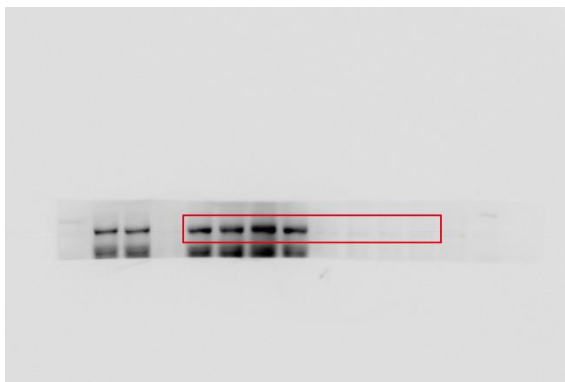

**Digital image (Heart tissue)**

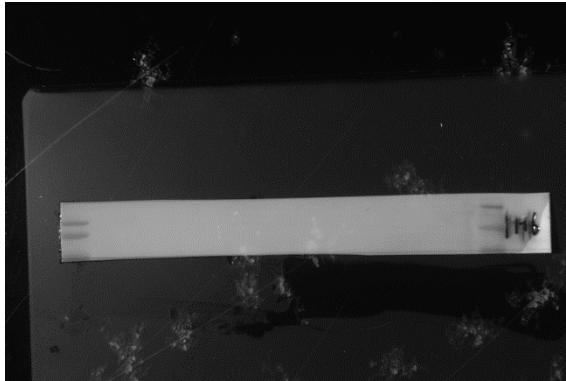

**Chemiluminescence image (Kidney tissue)**

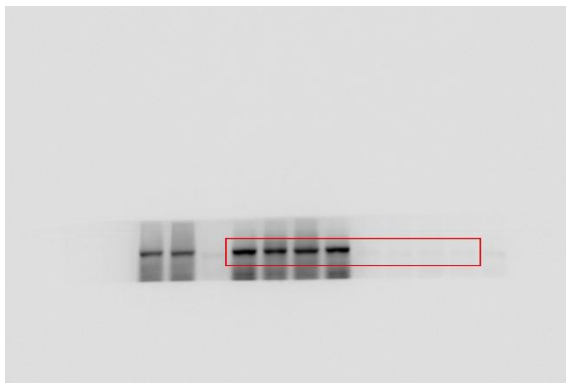

**Digital image (Kidney tissue)**

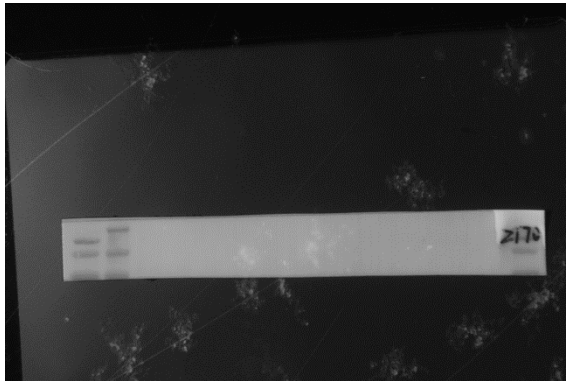

**Fig. S1d**

Full unedited gel for Fig. S1d

The lanes in the red box are the lanes in Fig. S1d

The groups in the red box are WT, WT, WT, WT, HDAC6<sup>-/-</sup>, HDAC6<sup>-/-</sup>, HDAC6<sup>-/-</sup>, and HDAC6<sup>-/-</sup>, respectively.

Antibodies against GAPDH

### Chemiluminescence image (combined)

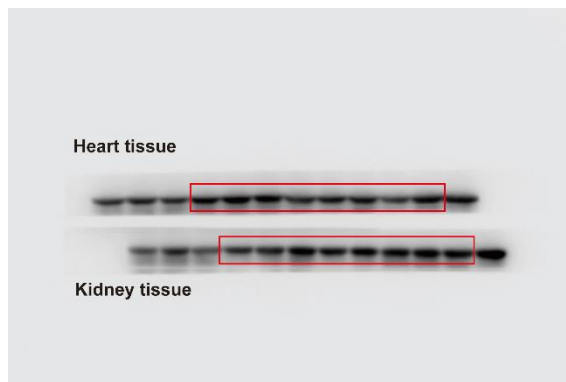

### Digital image (combined)

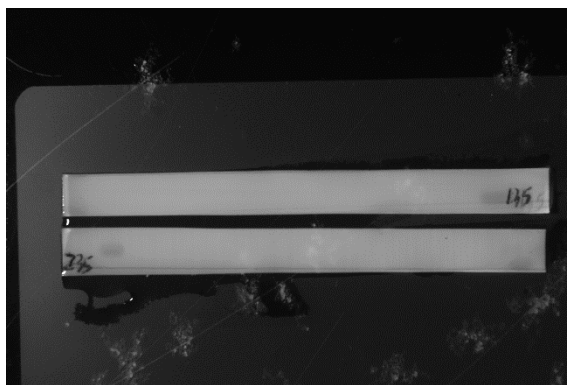

### Fig. S2c

Full unedited gel for Fig. 1b

The lanes in the red box are the lanes in Fig. S2c

The groups in the blue box are NC, Vehicle, NaHS (12  $\mu$ M), NC, Vehicle, NaHS (12  $\mu$ M), NC, Vehicle, NaHS (12  $\mu$ M), NC, Vehicle, and NaHS (12  $\mu$ M), respectively.

Antibodies against HDAC6

### Chemiluminescence image

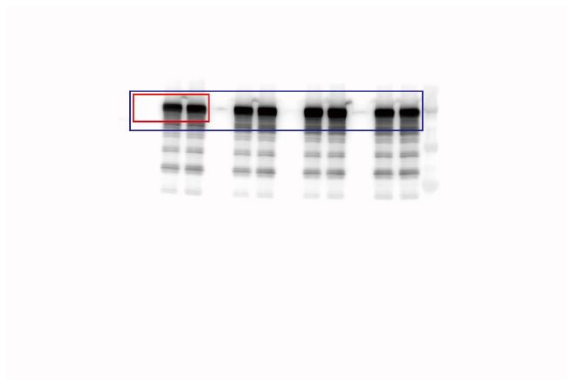

### Digital image

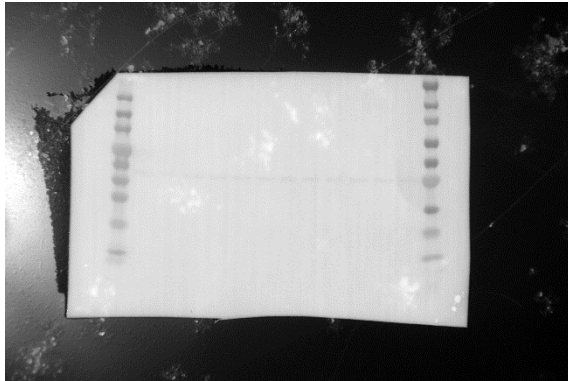

### Fig. S2c

Full unedited gel for Fig. 1b

The lanes in the red box are the lanes in Fig. S2c

The groups in the blue box are NC, Vehicle, NaHS (12  $\mu$ M), NC, Vehicle, NaHS (12  $\mu$ M), NC, Vehicle, NaHS (12  $\mu$ M), NC, Vehicle, and NaHS (12  $\mu$ M), respectively.

Antibodies against acetylated  $\alpha$ -tubulin

### Chemiluminescence image

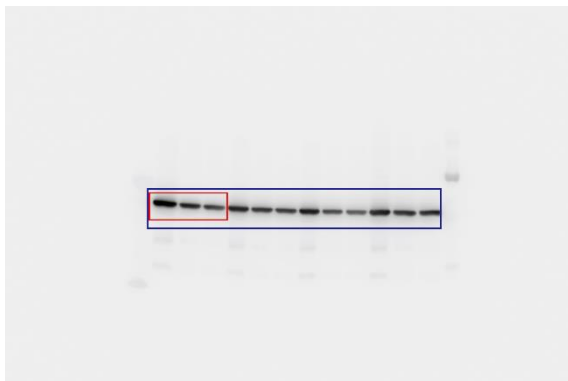

### Digital image

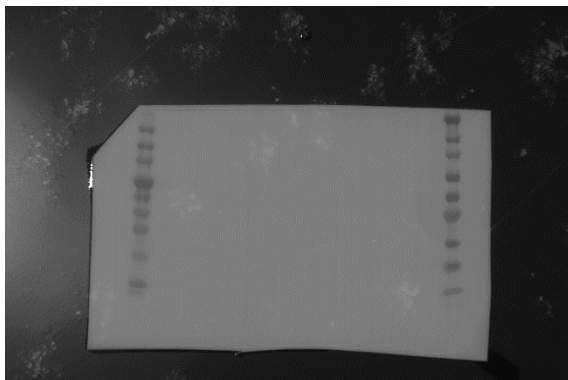



### Fig. S2c

Full unedited gel for Fig. 1b

The lanes in the red box are the lanes in Fig. S2c

The groups in the blue box are NC, Vehicle, NaHS (12  $\mu$ M), NC, Vehicle, NaHS (12  $\mu$ M), NC, Vehicle, NaHS (12  $\mu$ M), NC, Vehicle, and NaHS (12  $\mu$ M), respectively.

Antibodies against  $\alpha$ -tubulin

### Chemiluminescence image

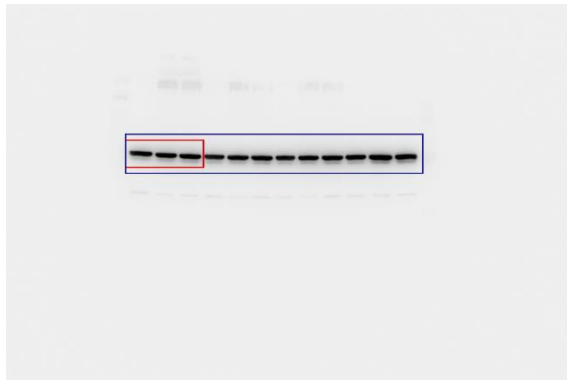

### Digital image

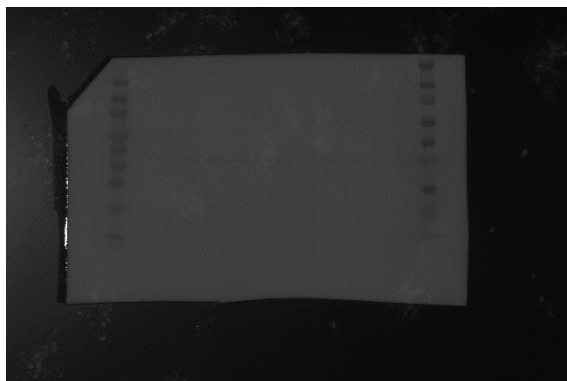

Supplement: Supplementary file 1 [file faafdaabf3e841421767ea0a.pdf]
