# Supplementary material for: Hydrogen sulfide binds to the catalytic zinc ion in HDAC6 to modulate enzyme activity via an alternative deacetylation pathway
Source: Research Square preprint supplement (doi:10.21203/rs.3.rs-777997/v1), 2026-01-12
Supplement: Supplementary file 1 [file 877b56344253b601115292e1.docx]

**Uncut gel image used in the manuscript**

**Figure 6a**

Full unedited gel for Figure 6a

The lanes in the red box are the lanes in Figure 6a

The groups in the blue box are Vehicle, NaHS (60 μM), Vehicle, NaHS (60 μM), Vehicle, NaHS (60 μM), Vehicle, NaHS (60 μM), Vehicle, NaHS (60 μM), Vehicle, and NaHS (60 μM), respectively**.**

Antibodies against HDAC6

**Chemiluminescence image**

‘
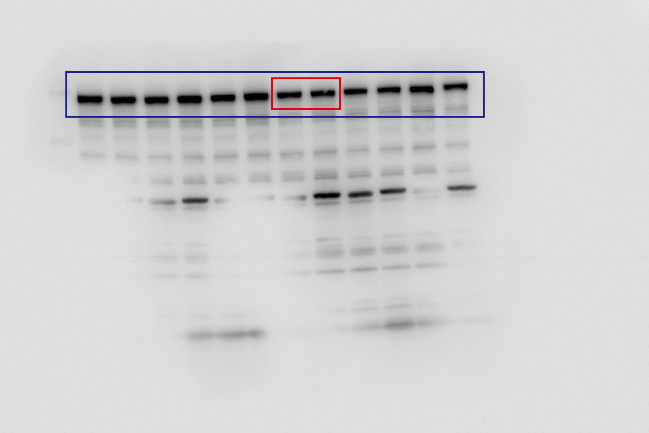


**Digital image**





**Figure 6a**

Full unedited gel for Figure 6a

The lanes in the red box are the lanes in Figure 6a

The groups in the blue box are Vehicle, NaHS (60 μM), Vehicle, NaHS (60 μM), Vehicle, NaHS (60 μM), Vehicle, NaHS (60 μM), Vehicle, NaHS (60 μM), Vehicle, and NaHS (60 μM), respectively**.**

Antibodies against acetylated α-tubulin

**Chemiluminescence image**


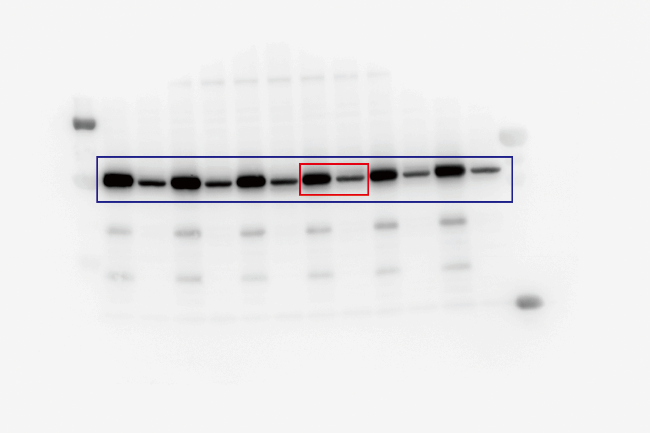


**Digital image**





**Figure 6a**

Full unedited gel for Figure 6a

The lanes in the red box are the lanes in Figure 6a

The groups in the blue box are Vehicle, NaHS (60 μM), Vehicle, NaHS (60 μM), Vehicle, NaHS (60 μM), Vehicle, NaHS (60 μM), Vehicle, NaHS (60 μM), Vehicle, and NaHS (60 μM), respectively**.**

Antibodies against α-tubulin

**Chemiluminescence image**


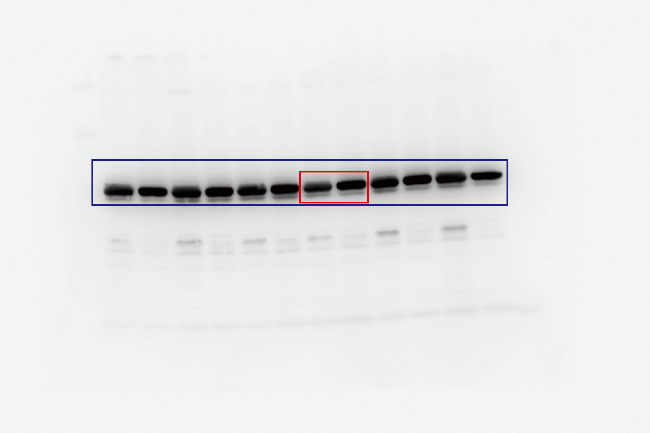


**Digital image**





**Figure S17c**

Full unedited gel for Figure S17c

The lanes in the red box are the lanes in Figure S17c

The groups in the blue box are NC, Vehicle, NaHS (12 μM), NC, Vehicle, NaHS (12 μM), NC, Vehicle, NaHS (12 μM), NC, Vehicle, and NaHS (12 μM), respectively**.**

Antibodies against HDAC6

**Chemiluminescence image**

**
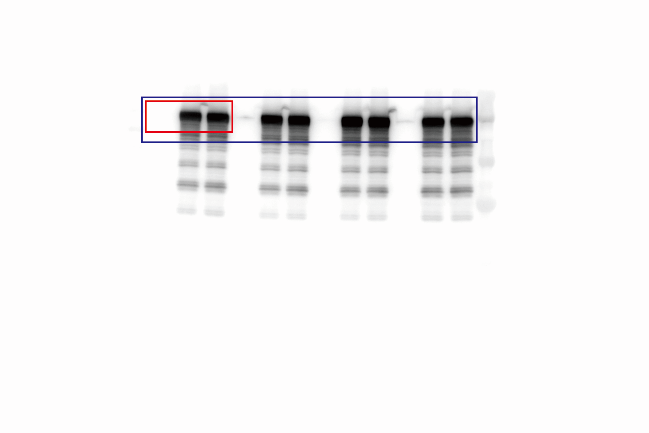
**

**Digital image**

**

**

**Figure S17c**

Full unedited gel for Figure S17c

The lanes in the red box are the lanes in Figure S17c

The groups in the blue box are NC, Vehicle, NaHS (12 μM), NC, Vehicle, NaHS (12 μM), NC, Vehicle, NaHS (12 μM), NC, Vehicle, and NaHS (12 μM), respectively**.**

Antibodies against acetylated α-tubulin

**Chemiluminescence image**


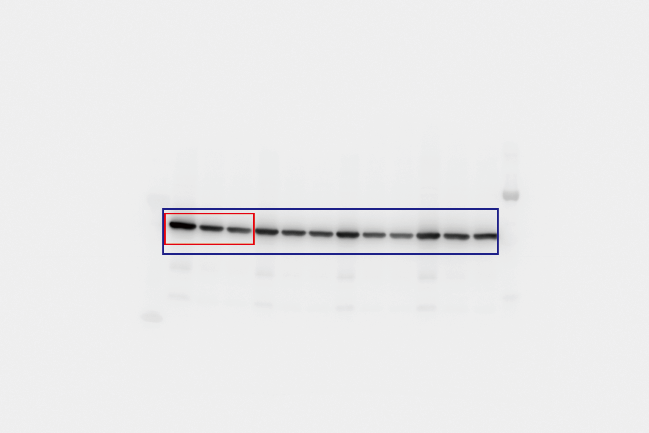


**Digital image**





**Figure S17c**

Full unedited gel for Figure S17c

The lanes in the red box are the lanes in Figure S17c

The groups in the blue box are NC, Vehicle, NaHS (12 μM), NC, Vehicle, NaHS (12 μM), NC, Vehicle, NaHS (12 μM), NC, Vehicle, and NaHS (12 μM), respectively**.**

Antibodies against α-tubulin

**Chemiluminescence image**

**
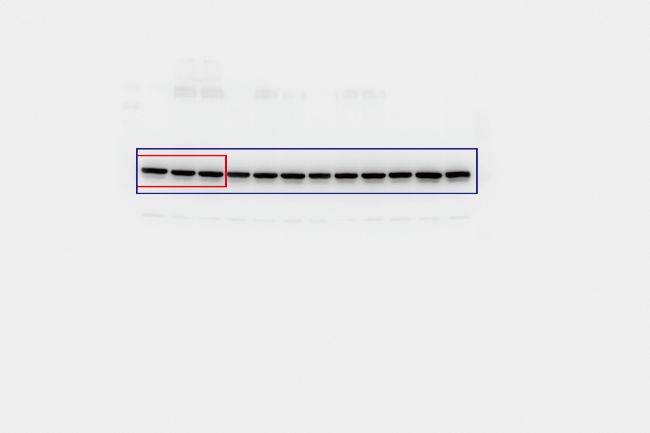
**

**Digital image**

**

**

**Figure S35a**

Full unedited gel for Figure S35a

The lanes in the red box are the lanes in Figure S35a

The groups in the red box are WT, sh-NC, sh-HDAC6-1, and sh-HDAC6-2, respectively**.**

Antibodies against HDAC6

**Chemiluminescence image**


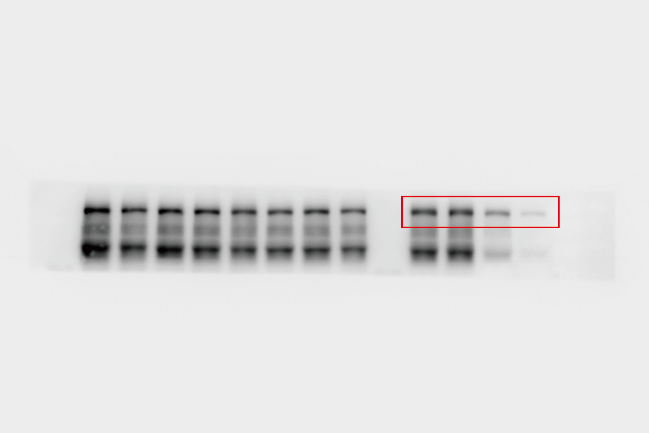


**Digital image**





**Figure S35a**

Full unedited gel for Figure S35a

The lanes in the red box are the lanes in Figure S35a

The groups in the red box are WT, sh-NC, sh-HDAC6-1, and sh-HDAC6-2, respectively**.**

Antibodies against acetylated α-tubulin

**Chemiluminescence image**


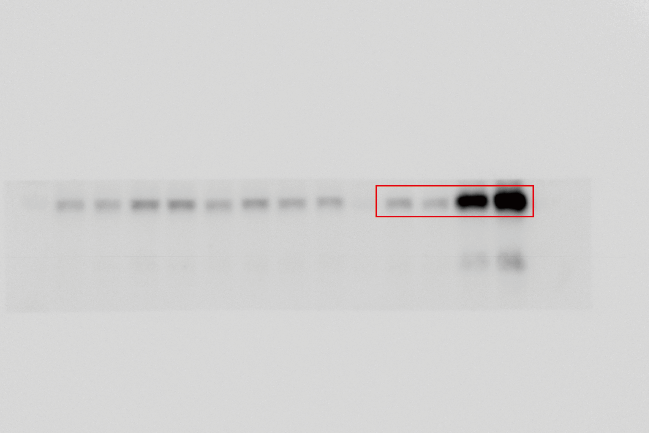


**Digital image**





**Figure S35a**

Full unedited gel for Figure S35a

The lanes in the red box are the lanes in Figure S35a

The groups in the red box are WT, sh-NC, sh-HDAC6-1, and sh-HDAC6-2, respectively**.**

Antibodies against α-tubulin

**Chemiluminescence image**

**
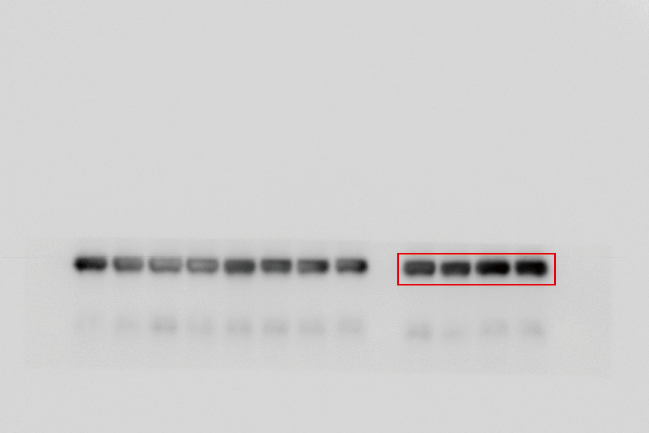
**

**Digital image**

**

**

**Figure S37c**

Full unedited gel for Figure Figure S37d

The lanes in the red box are the lanes in Figure S37d

The groups in the red box are WT and HDAC6, respectively

Antibodies against HDAC6

**Chemiluminescence image**


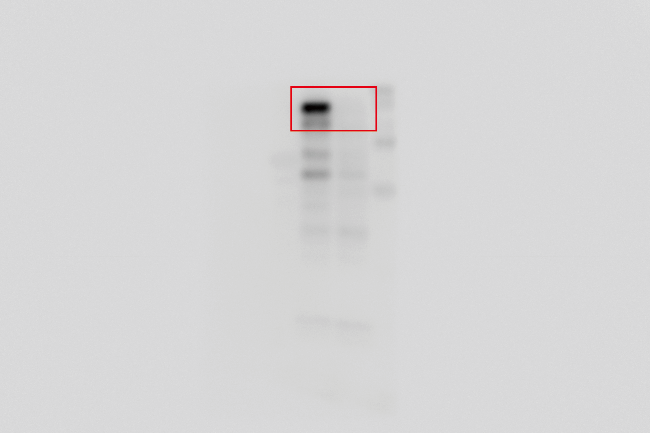


**Digital image**





**Figure S37c**

Full unedited gel for Figure Figure S37d

The lanes in the red box are the lanes in Figure S37d

The groups in the red box are WT and HDAC6, respectively

Antibodies against acetylated α-tubulin

**Chemiluminescence image**


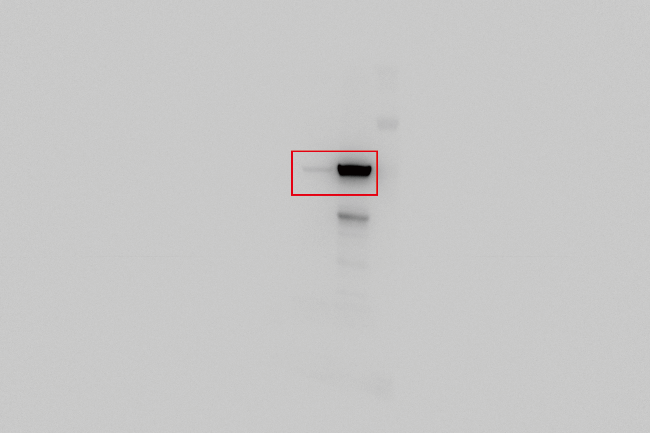


**Digital image**





**Figure S37c**

Full unedited gel for Figure Figure S37c

The lanes in the red box are the lanes in Figure S37cc

The groups in the red box are WT and HDAC6, respectively

Antibodies against α-tubulin

**Chemiluminescence image**


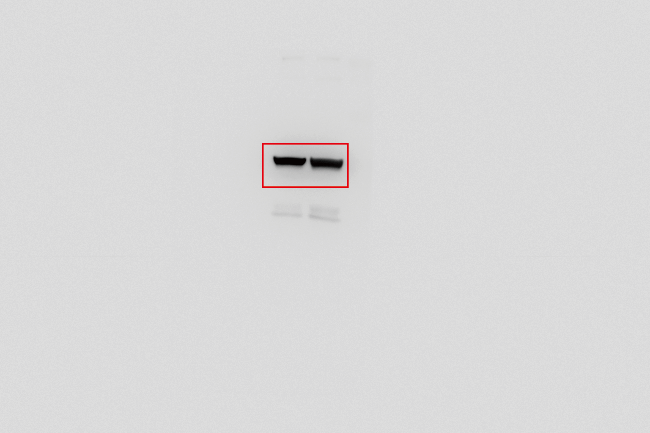


**Digital image**

**

**

**Figure S37d**

Full unedited gel for Figure Figure S37d

The lanes in the red box are the lanes in Figure S37d

The groups in the red box are HDAC6 KO, H216A, H611A, and H216/611A, respectively

Antibodies against HA tag

**Chemiluminescence image**


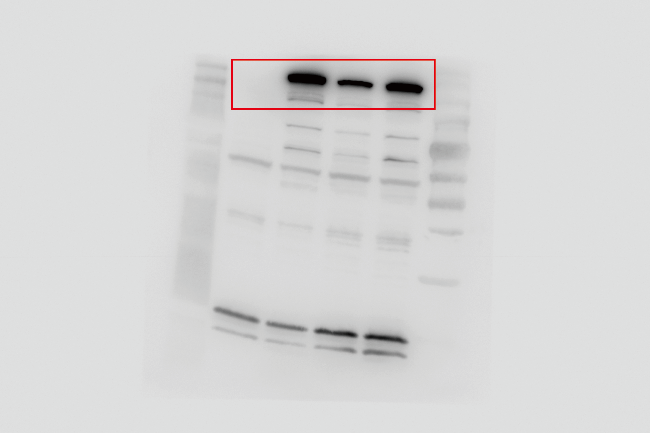


**Digital image**





**Figure S37d**

Full unedited gel for Figure Figure S37d

The lanes in the red box are the lanes in Figure S37d

The groups in the red box are HDAC6 KO, H216A, H611A, and H216/611A, respectively

Antibodies against acetylated α-tubulin

**Chemiluminescence image**


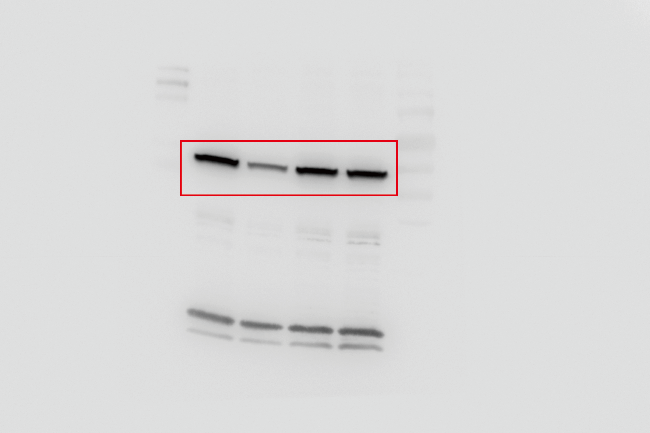


**Digital image**





**Figure S37d**

Full unedited gel for Figure Figure S37d

The lanes in the red box are the lanes in Figure S37d

The groups in the red box are HDAC6 KO, H216A, H611A, and H216/611A, respectively

Antibodies against α-tubulin

**Chemiluminescence image**


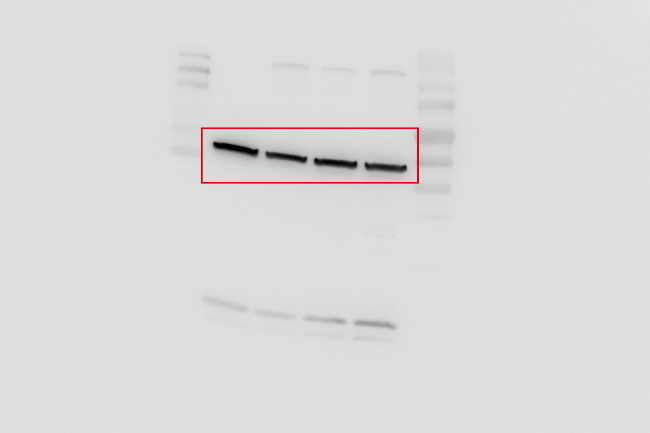


**Digital image**





**Figure S38a**

Full unedited gel for Figure S38a

The lanes in the red box are the lanes in Figure S38a

The groups in the red box are Flag-Vector, Flag-CD1, Flag-CD2, Flag-ZNF, Flag-CD1-2, Flag-WT, respectively**.**

Antibodies against Flag

**Chemiluminescence image (Input)**


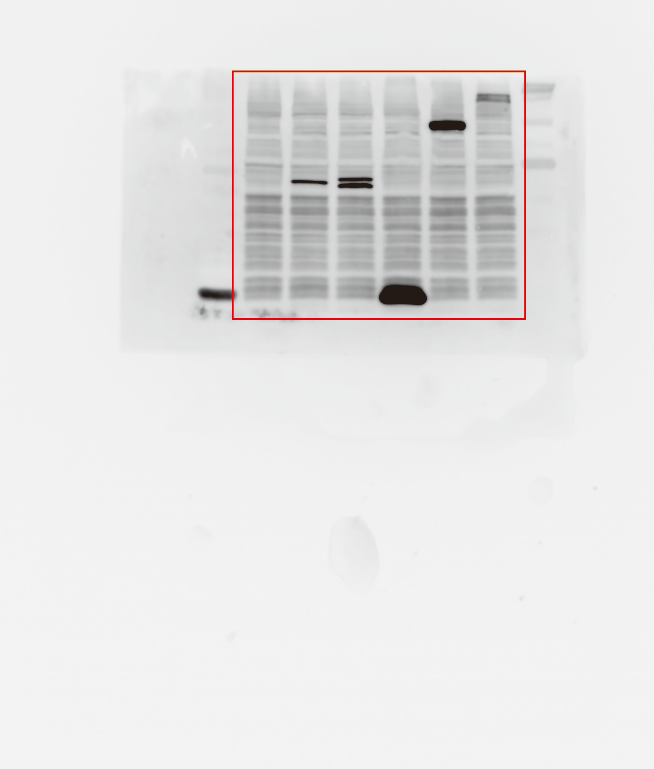


**Digital image (Input)**





**Chemiluminescence image (IP)**


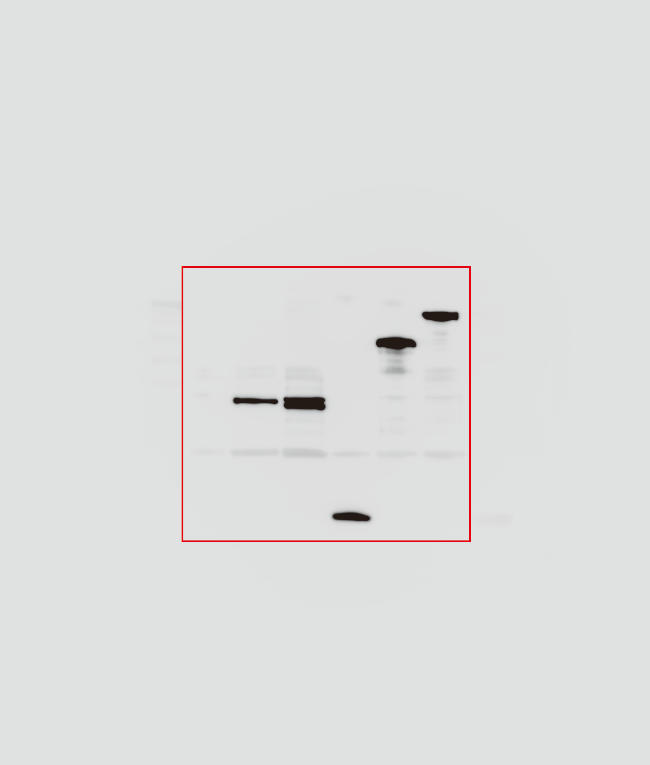


**Digital image (IP)**





**Figure S38a**

Full unedited gel for Figure S38a

The lanes in the red box are the lanes in Figure S38a

The groups in the red box are Flag-Vector, Flag-CD1, Flag-CD2, Flag-ZNF, Flag-CD1-2, Flag-WT, respectively**.**

Antibodies against CSE

**Chemiluminescence image (Input)**


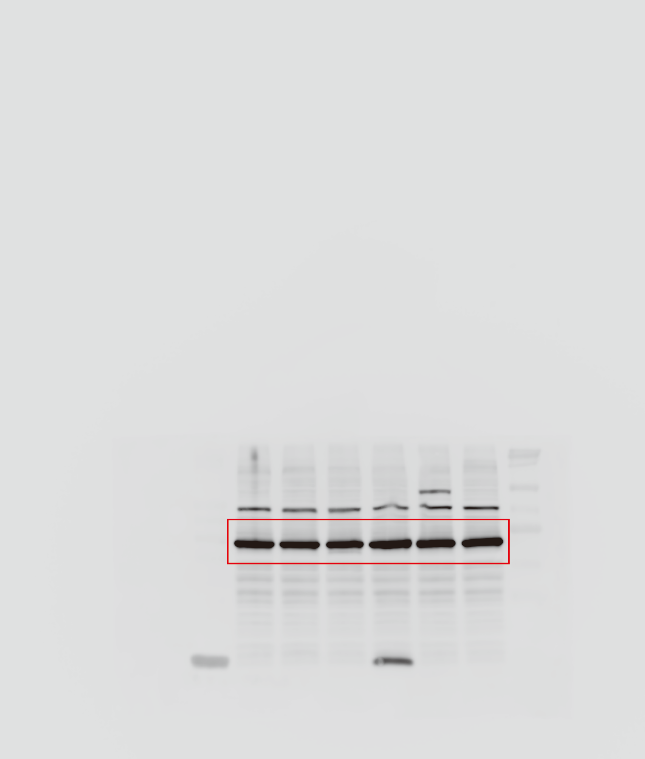


**Digital image (Input)**





**Chemiluminescence image (IP)**


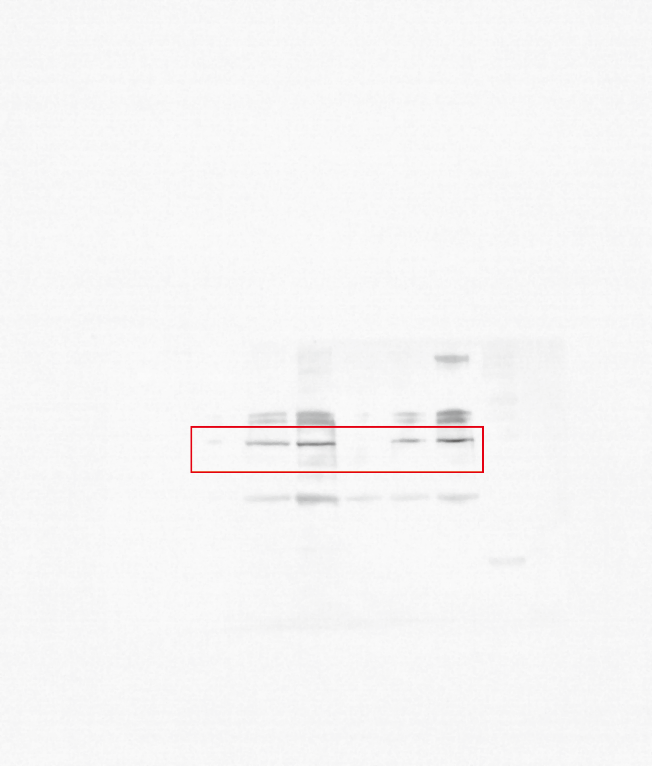


**Digital image (IP)**





**Figure S38a**

Full unedited gel for Figure S38a

The lanes in the red box are the lanes in Figure S38a

The groups in the red box are Flag-Vector, Flag-CD1, Flag-CD2, Flag-ZNF, Flag-CD1-2, Flag-WT, respectively**.**

Antibodies against GAPDH

**Chemiluminescence image (Input)**


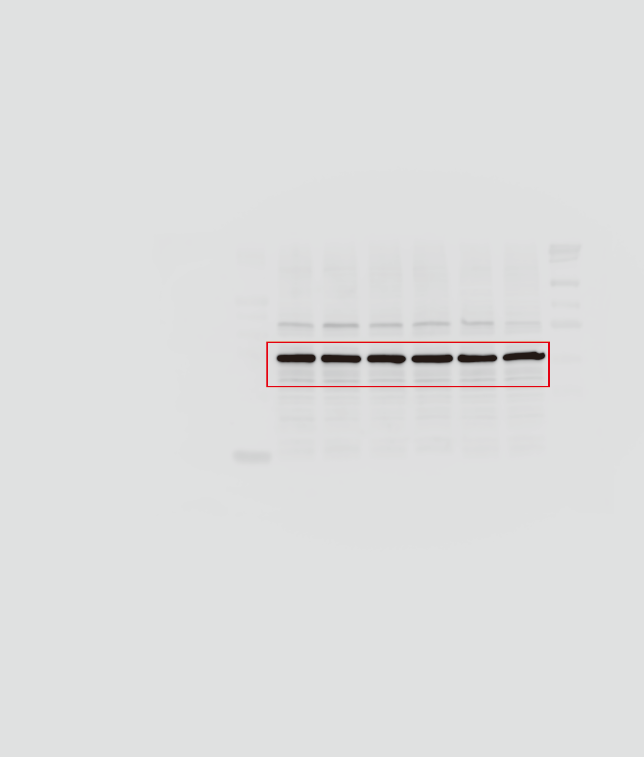


**Digital image (Input)**





**Figure S39a**

Full unedited gel for Figure S39a

The lanes in the red box are the lanes in Figure S39a

The groups in the blue box are WT Vehicle, WT Vehicle, WT NaHS (60 μM), HDAC6 KO Vehicle, HDAC6 KO NaHS (60 μM), WT starvation Vehicle, WT starvation NaHS (60 μM), HDAC6 KO starvation Vehicle, HDAC6 KO starvation NaHS (60 μM), respectively**.**

Antibodies against HDAC6

**Chemiluminescence image**


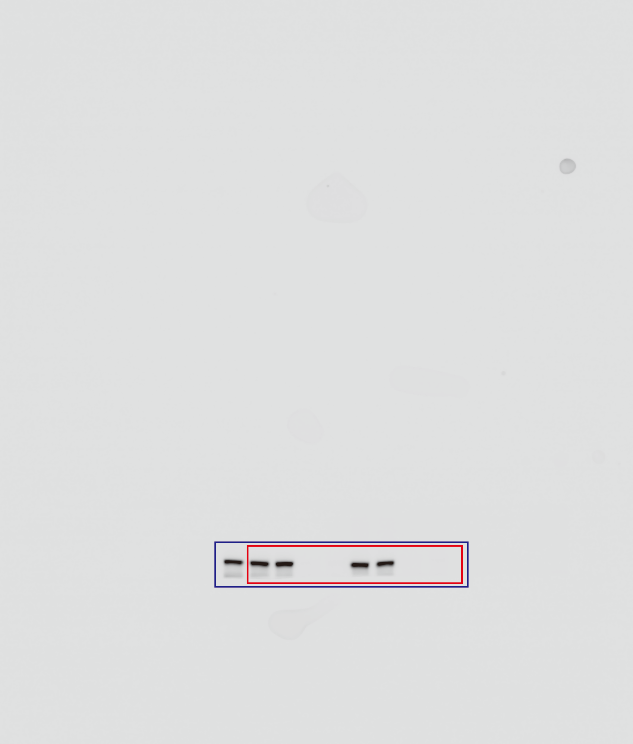


**Digital image**





**Figure S39a**

Full unedited gel for Figure S39a

The lanes in the red box are the lanes in Figure S39a

The groups in the blue box are WT Vehicle, WT Vehicle, WT NaHS (60 μM), HDAC6 KO Vehicle, HDAC6 KO NaHS (60 μM), WT starvation Vehicle, WT starvation NaHS (60 μM), HDAC6 KO starvation Vehicle, HDAC6 KO starvation NaHS (60 μM), respectively**.**

Antibodies against LC3B

**Chemiluminescence image**


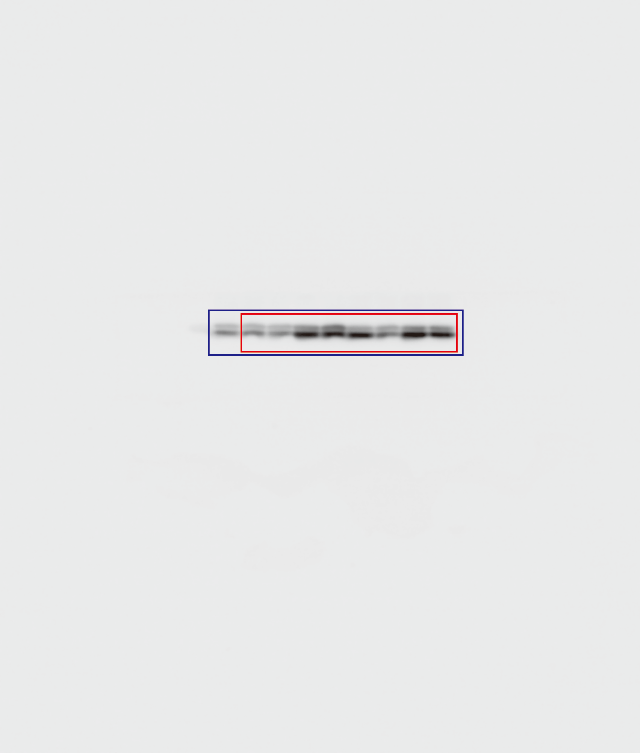


**Digital image**





**Figure S39a**

Full unedited gel for Figure S39a

The lanes in the red box are the lanes in Figure S39a

The groups in the blue box are WT Vehicle, WT Vehicle, WT NaHS (60 μM), HDAC6 KO Vehicle, HDAC6 KO NaHS (60 μM), WT starvation Vehicle, WT starvation NaHS (60 μM), HDAC6 KO starvation Vehicle, HDAC6 KO starvation NaHS (60 μM), respectively**.**

Antibodies against p62

**Chemiluminescence image**


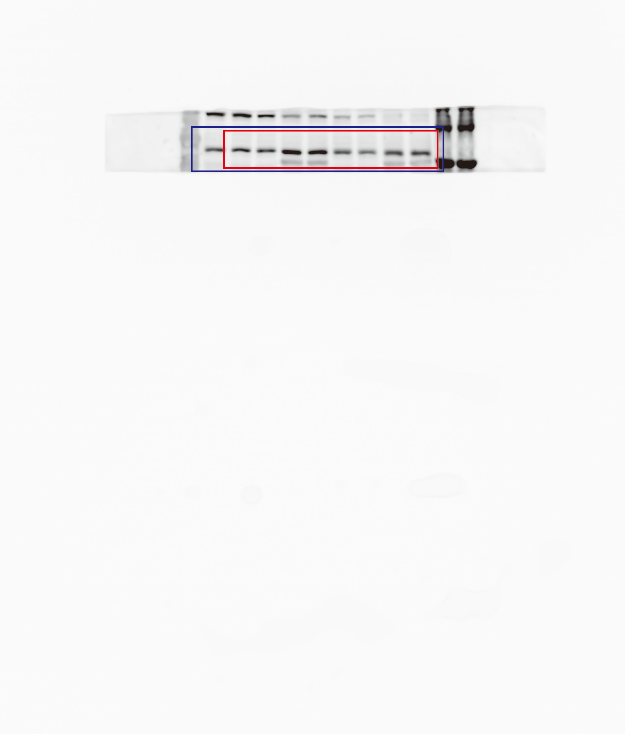


**Digital image**





**Figure S39a**

Full unedited gel for Figure S39a

The lanes in the red box are the lanes in Figure S39a

The groups in the blue box are WT Vehicle, WT Vehicle, WT NaHS (60 μM), HDAC6 KO Vehicle, HDAC6 KO NaHS (60 μM), WT starvation Vehicle, WT starvation NaHS (60 μM), HDAC6 KO starvation Vehicle, HDAC6 KO starvation NaHS (60 μM), respectively**.**

Antibodies against Beclin1

**Chemiluminescence image**


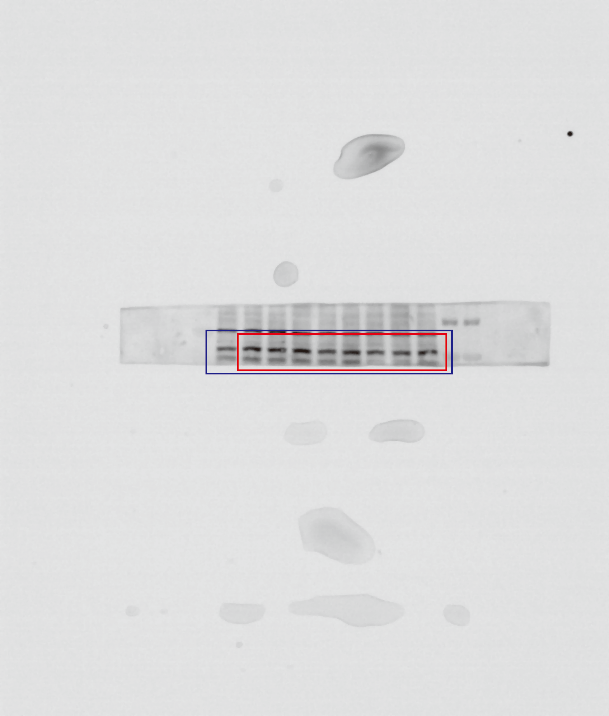


**Digital image**





**Figure S39a**

Full unedited gel for Figure S39a

The lanes in the red box are the lanes in Figure S39a

The groups in the blue box are WT Vehicle, WT Vehicle, WT NaHS (60 μM), HDAC6 KO Vehicle, HDAC6 KO NaHS (60 μM), WT starvation Vehicle, WT starvation NaHS (60 μM), HDAC6 KO starvation Vehicle, HDAC6 KO starvation NaHS (60 μM), respectively**.**

Antibodies against GAPDH

**Chemiluminescence image**


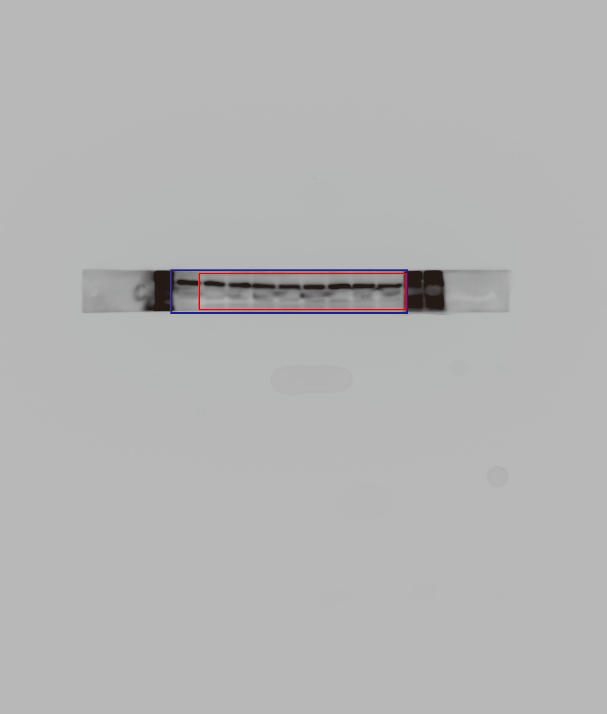


**Digital image**





**Figure S40e**

Full unedited gel for Figure S40e

The lanes in the red box are the lanes in Figure S40e

The groups in the blue box are Vehicle, NaHS (60 μM), Vehicle, NaHS (60 μM), Vehicle, NaHS (60 μM), respectively**.**

Antibodies against HDAC6

**Chemiluminescence image**


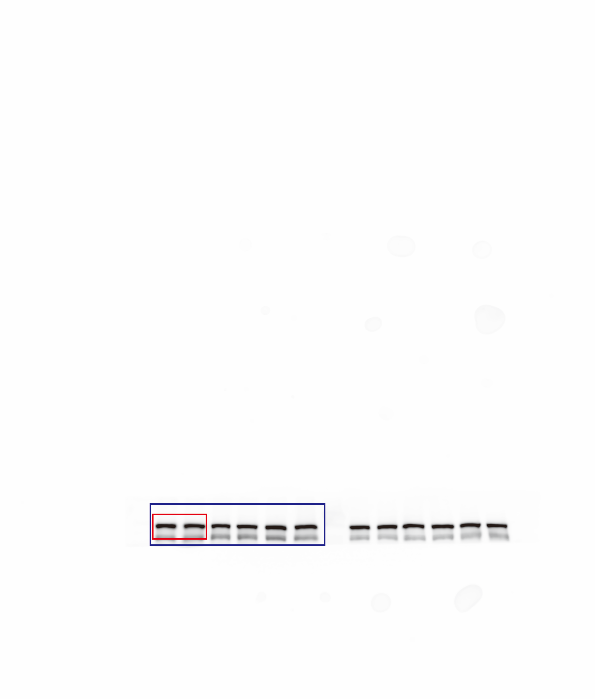


**Digital image**





**Figure S40e**

Full unedited gel for Figure S40e

The lanes in the red box are the lanes in Figure S40e

The groups in the blue box are Vehicle, NaHS (60 μM), Vehicle, NaHS (60 μM), Vehicle, NaHS (60 μM), respectively**.**

Antibodies against acetylated α-tubulin

**Chemiluminescence image**


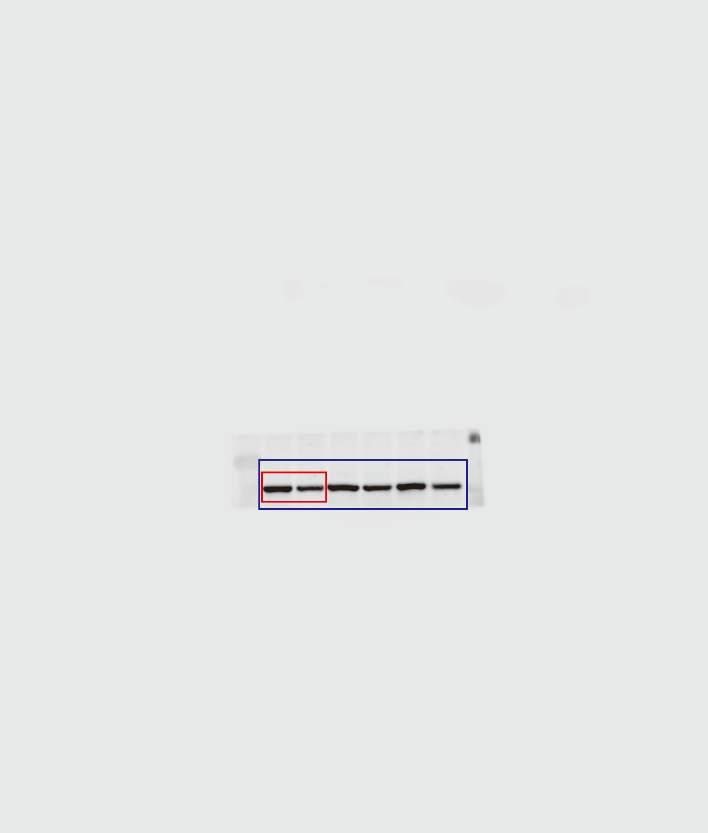


**Digital image**





**Figure S40e**

Full unedited gel for Figure S40e

The lanes in the red box are the lanes in Figure S40e

The groups in the blue box are Vehicle, NaHS (60 μM), Vehicle, NaHS (60 μM), Vehicle, NaHS (60 μM), respectively**.**

Antibodies against α-tubulin

**Chemiluminescence image**


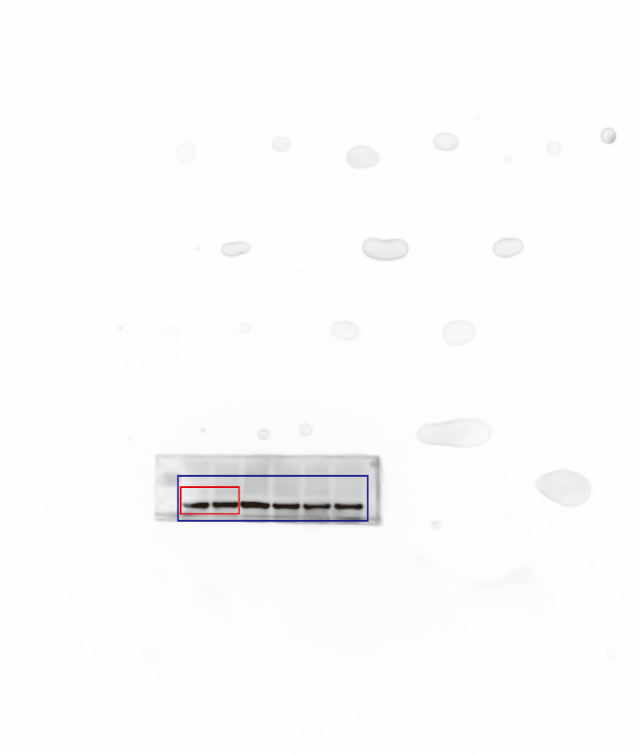


**Digital image**





**Figure S41a**

Full unedited gel for Figure S41a

The lanes in the red box are the lanes in Figure S41a

The groups in the red box are WT, WT, WT, WT, HDAC6-/-, HDAC6-/-, HDAC6-/-, and HDAC6-/-, respectively**.**

Antibodies against HDAC6

**Chemiluminescence image (Heart tissue)**

**
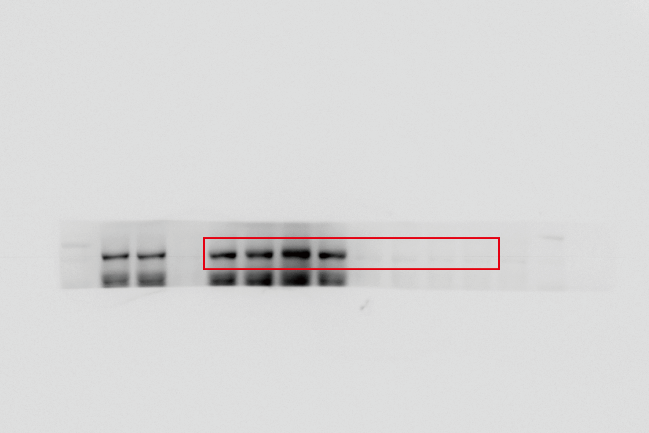
**

**Digital image (Heart tissue)**

**

**

**Chemiluminescence image (Kidney tissue)**

**
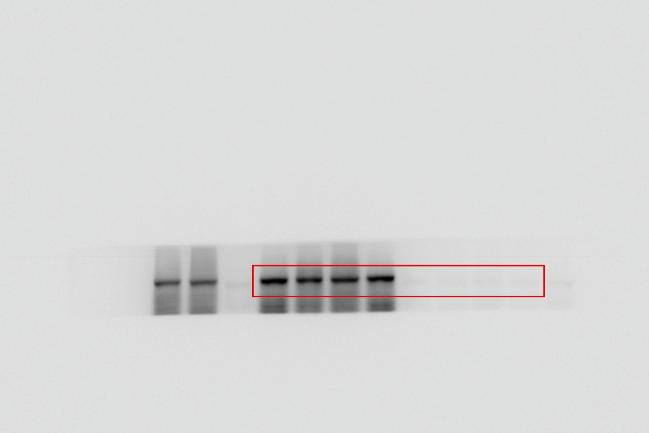
**

**Digital image (Kidney tissue)**

**

**

**Figure S41a**

Full unedited gel for Figure S41a

The lanes in the red box are the lanes in Figure S41a

The groups in the red box are WT, WT, WT, WT, HDAC6-/-, HDAC6-/-, HDAC6-/-, and HDAC6-/-, respectively**.**

Antibodies against GAPDH

**Chemiluminescence image (combined)**


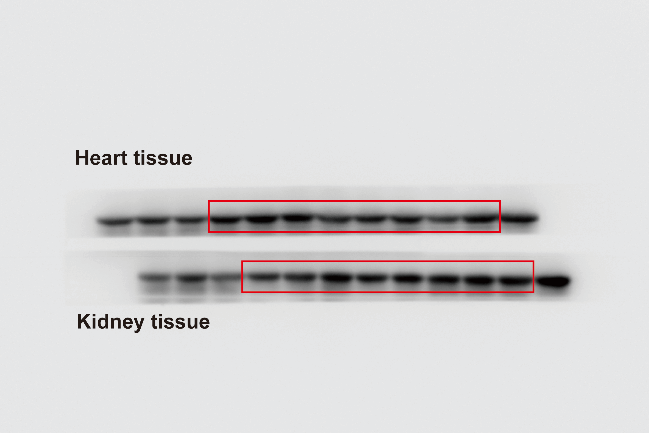


**Digital image (combined)**

**

**
